# Supplementary material for: Photoelectrochemical cells with a pyridine-anchored organic dye photoanode for efficient H2 generation by water reduction
Source: Royal Society of Chemistry journal article supplement (doi:10.1039/d3cc01017a), 2023-01-01
Supplement: d3cc01017a2.pdf [file d3cc01017a2.pdf]

**Electronic Supplementary Information:**

**Photoelectrochemical cells with a pyridine-anchored organic dye photoanode for efficient H<sub>2</sub> generation by water reduction**

Kun Tang,<sup>a,b</sup> Jiang-Yang Shao,<sup>a</sup> and Yu-Wu Zhong<sup>\*a,b</sup>

<sup>a</sup>Beijing National Laboratory for Molecular Sciences, CAS Research/Education Center for Excellence in Molecular Sciences, Key Laboratory of Photochemistry, Institute of Chemistry, Chinese Academy of Sciences; Beijing, 100190, China.

<sup>b</sup>School of Chemical Sciences, University of Chinese Academy of Sciences; Beijing 100049, China.

\*Email: zhongyuwu@iccas.ac.cn

## Materials and Measurements

Phenylboronic acid, pyridylboronic acid, bis(4-bromophenyl)amine, cesium carbonate, sodium tert-butoxide, tris(tert-butyl)phosphine (10% in toluene), tetrakis(triphenylphosphine)-palladium(0) and tris(dibenzylideneacetone)dipalladium(0) were purchased from Inno-chem and used without further purification. Di(*p*-pyrid-4-ylphenyl)amine was prepared according to the literature method.<sup>1</sup> All solvents in the synthesis are reagent grade. The <sup>1</sup>H NMR and <sup>13</sup>C NMR spectra were recorded with a 400 MHz Bruker Avance spectrometer. Steady state absorptions were recorded by using a Perkin-Elmer Lambda 750 UV/VIS/NIR spectrophotometer. Hydrogen evolution was detected by gas chromatography (GC7900) using high-purity argon as carrier gas. Photocurrent measurements were taken using a CHI 660D potentiostat under an atmosphere of nitrogen. Potentials are referenced to a Ag/AgCl electrode in saturated aqueous KCl without compensation for the liquid junction potential.

## Synthesis and characterization

**APyr:** A mixture of 1-bromopyrene (28 mg, 0.1 mmol), di(*p*-pyrid-4-ylphenyl)amine (48 mg, 0.15 mmol), tris(dibenzylideneacetone)dipalladium(0) (18.3 mg, 0.02 mmol), tris(tert-butyl)phosphine (3.3 mg, 0.015 mmol) and sodium tert-butoxide (48 mg, 0.5 mmol) in 10 mL dry toluene was bubbled with nitrogen for 15 min, followed by refluxing at 120 °C for 1 day. After cooling to room temperature, the solvent was removed under reduced pressure. The residue was subjected to column chromatography on silica gel (eluent: dichloromethane/methanol, 100/1) to afford 23.5 mg of **APyr** as a yellow solid in 45% yield. <sup>1</sup>H NMR (400 MHz, chloroform-*d*): δ 8.61 (d, *J* = 5.8 Hz, 4H), 8.23 (dd, *J* = 7.8, 4.6 Hz, 2H), 8.18 – 8.07 (m, 4H), 8.02 (dd, *J* = 14.4, 8.4 Hz, 2H), 7.91 (d, *J* = 8.1 Hz, 1H), 7.54 (d, *J* = 8.7 Hz, 4H), 7.46 (d, *J* = 6.0 Hz, 4H), 7.22 (d, *J* = 8.6 Hz, 4H). <sup>13</sup>C NMR (101 MHz, CDCl<sub>3</sub>): δ 150.24, 148.94, 147.48, 139.51, 131.38, 131.23, 130.99, 130.26, 128.54, 128.39, 127.67, 127.63, 127.16, 126.45, 126.41, 126.14, 125.62, 125.45, 124.77, 122.75, 122.26, 120.88. MALDI-HRMS for C<sub>38</sub>H<sub>25</sub>N<sub>3</sub>: calcd 523.2043; found: 523.2042.

**DAPyr:** A mixture of 1,6-dibromopyrene (72 mg, 0.20 mmol), di(*p*-pyrid-4-ylphenyl)amine (194 mg, 0.60 mmol), tris(dibenzylideneacetone)dipalladium(0) (16.5 mg, 0.018 mmol), tris(tert-butyl)phosphine (13 mg, 0.060 mmol) and sodium tert-butoxide (91 mg, 1.0 mmol) in 25 mL

dry toluene was bubbled with nitrogen for 10 min, followed by refluxing at 120 °C for 2 days. After cooling to room temperature, the solvent was removed under reduced pressure. The residue was subjected to column chromatography on silica gel (eluent: dichloromethane/methanol/ammonia, 100/2/0.2) to afford 93 mg of **DAPyr** as a yellow solid in 55% yield. <sup>1</sup>H NMR (400 MHz, CDCl<sub>3</sub>): δ 7.21 (d, *J* = 8.6 Hz, 8H), 7.46 (d, *J* = 6.0 Hz, 8H), 7.55 (d, *J* = 8.6 Hz, 8H), 7.91 (d, *J* = 8.1 Hz, 2H), 8.01 (d, *J* = 9.3 Hz, 2H), 8.16-8.21 (m, overlapped, 4H), 8.62 (d, *J* = 6.0 Hz, 8H). <sup>13</sup>C NMR (100 MHz, chloroform-*d*): δ 120.89, 122.36, 123.03, 126.52, 126.62, 127.94, 128.23, 128.48, 130.01, 131.59, 140.16, 147.41, 148.88, 150.28. MALDI-HRMS for C<sub>60</sub>H<sub>40</sub>N<sub>6</sub>: calcd 844.3309; found: 844.3314.

**TAPyr**: A mixture of 1,3,6,8-tetrabromopyrene (26 mg, 0.05 mmol), di(*p*-pyrid-4-yl-phenyl)amine (113 mg, 0.35 mmol), tris(dibenzylideneacetone)dipalladium(0) (9.16 mg, 0.01 mmol), tris(*tert*-butyl)phosphine (3.0 mg, 0.015 mmol) and sodium *tert*-butoxide (24 mg, 0.25 mmol) in dry toluene (15 mL) was bubbled with nitrogen for 15 min and heated at 120 °C for 3 days. After cooling, the solvent was removed under reduced pressure. The residue was subjected to column chromatography on silica gel (eluent: dichloromethane/methanol/ammonia, 100/4/0.3) to afford 35 mg of **TAPyr** as a yellow solid in 47% yield. <sup>1</sup>H NMR (400 MHz, chloroform-*d*): δ 8.58 (d, *J* = 6.2 Hz, 16H), 8.09 (s, 4H), 7.80 (s, 2H), 7.51 (d, *J* = 8.7 Hz, 16H), 7.40 (d, *J* = 6.2 Hz, 16H), 7.17 (d, *J* = 8.7 Hz, 16H). <sup>13</sup>C NMR (101 MHz, chloroform-*d*): δ 150.08, 148.44, 147.29, 141.51, 131.96, 130.55, 128.46, 128.00, 127.68, 123.74, 122.35, 120.84, 120.84. MALDI-HRMS for C<sub>104</sub>H<sub>70</sub>N<sub>12</sub>: calcd 1486.5841; found: 1486.5840.

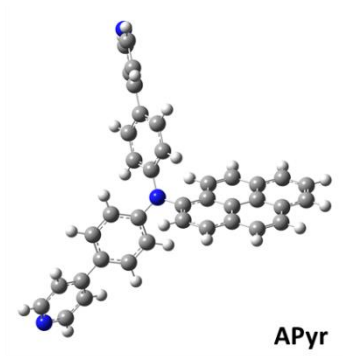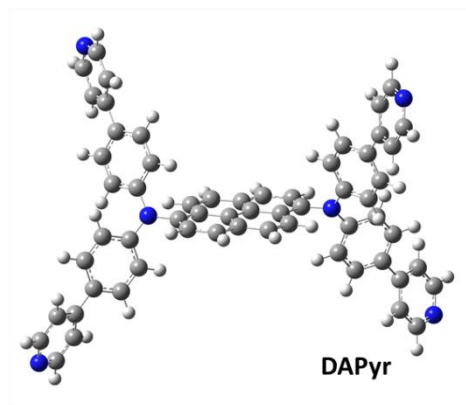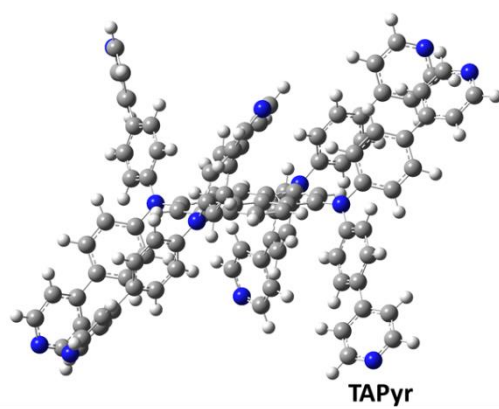

**Figure S1.** DFT-optimized structures of dye molecules (b3lyp/6-31g\*).

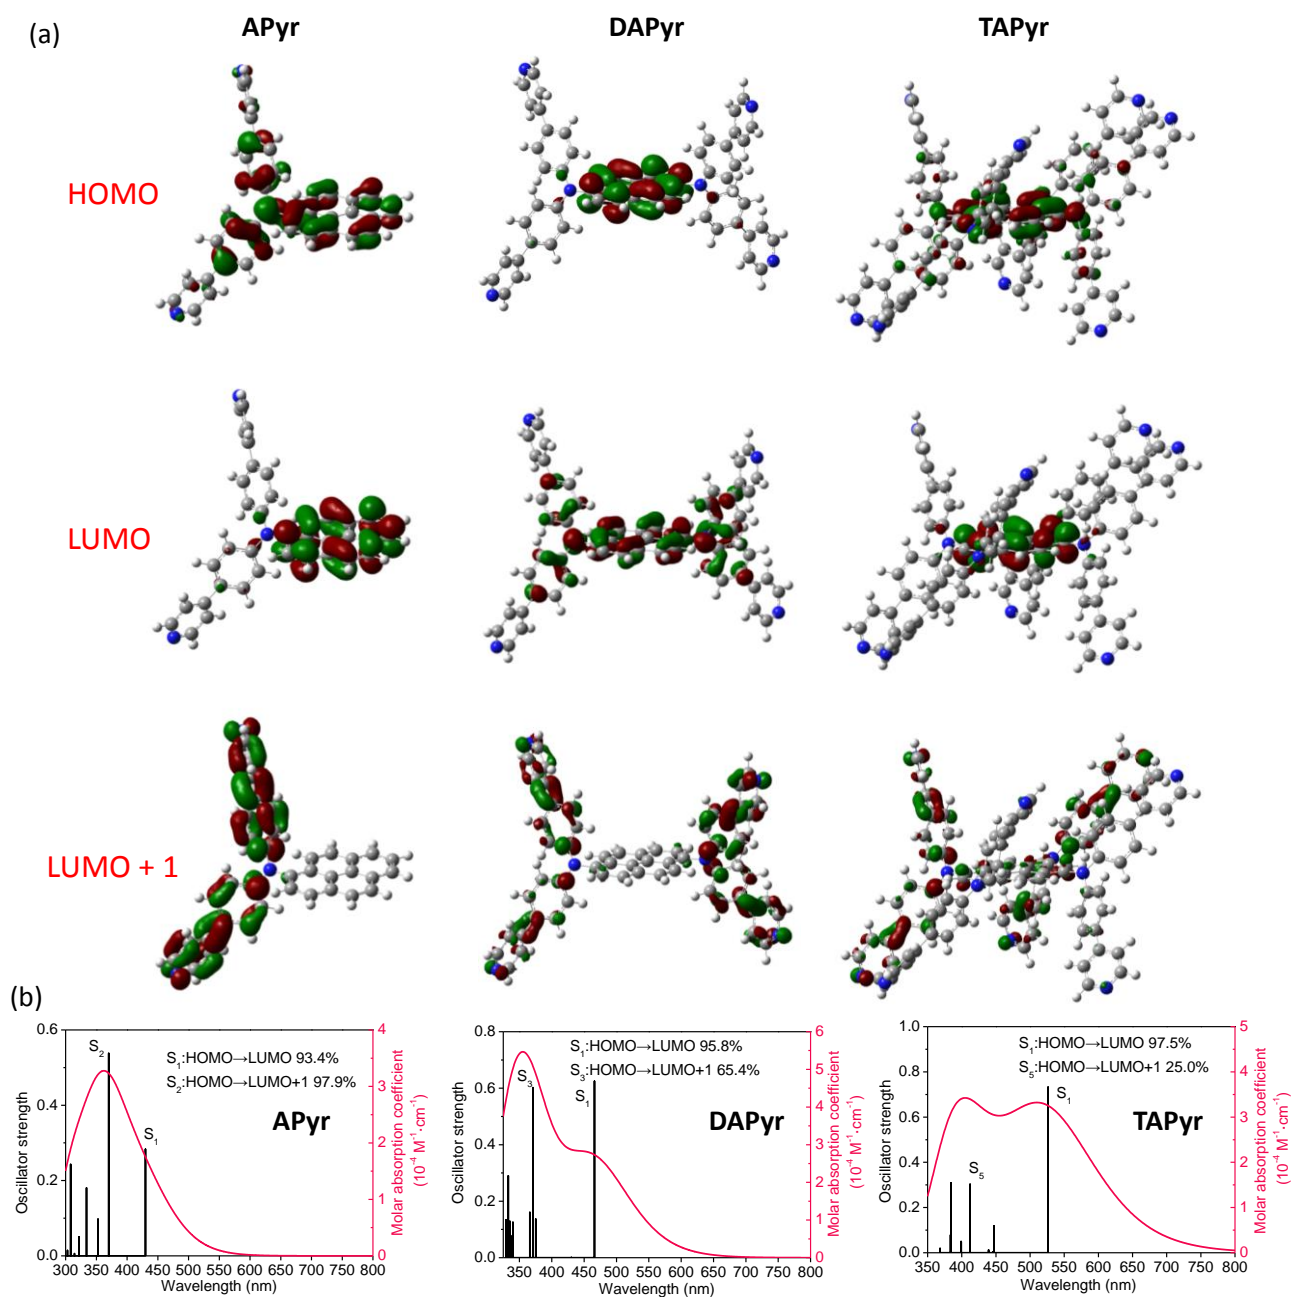

**Figure S2.** (a) DFT calculated HOMO and LUMO and (b) TD-DFT calculated excitations of the dye molecules (on the level of b3lyp/6-31g\*, isovalue=0.03). HOMO = highest occupied molecular orbital; LUMO = lowest unoccupied molecular orbital.

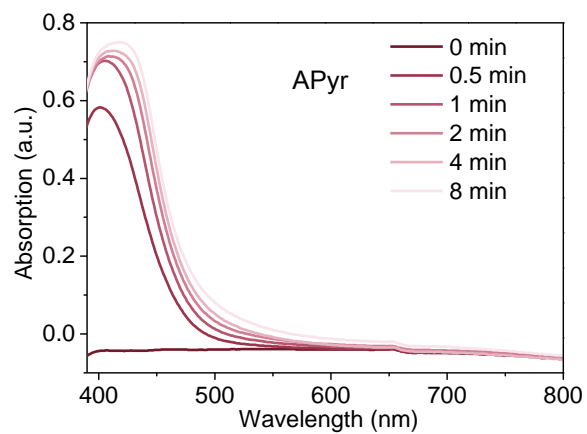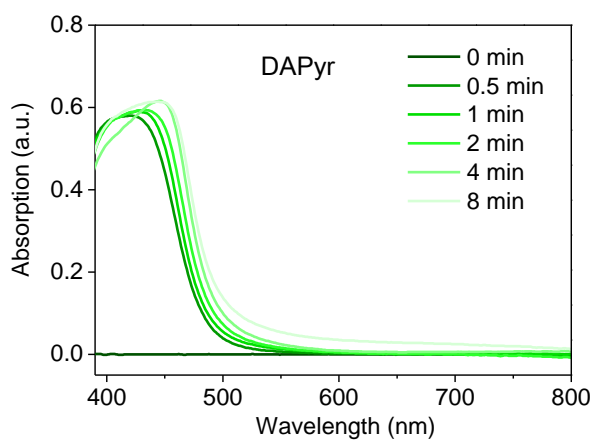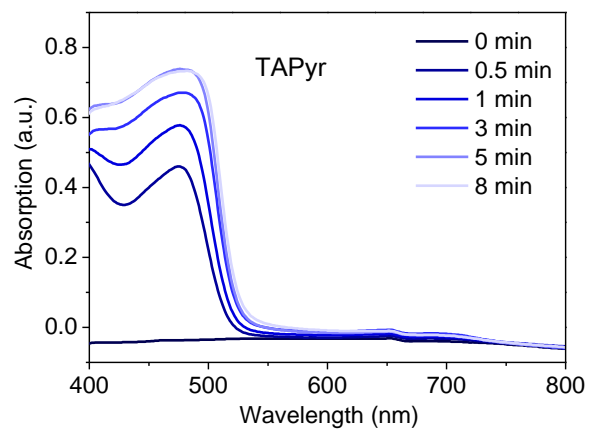

**Figure S3.** Absorption spectra of the FTO/TiO<sub>2</sub>/dyes versus immersion time in dyes/DCM solutions.

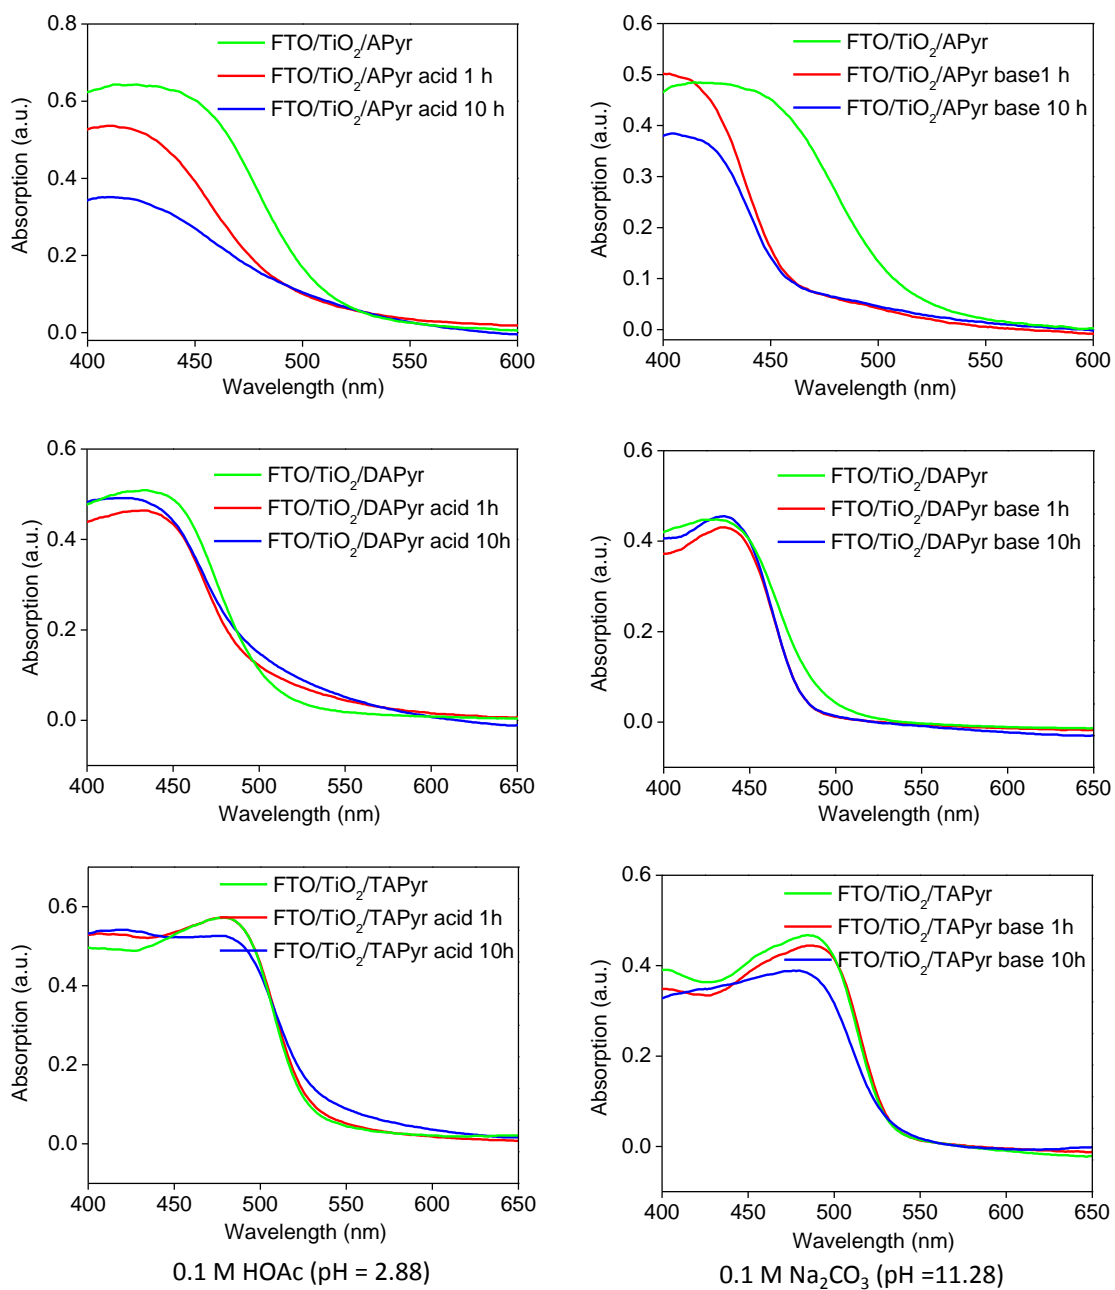

**Figure S4.** Absorption spectra of the FTO/TiO<sub>2</sub>/dye electrodes after the electrodes were immersed in 0.1 M HOAc or 0.1 M Na<sub>2</sub>CO<sub>3</sub> solution for 10 hours.

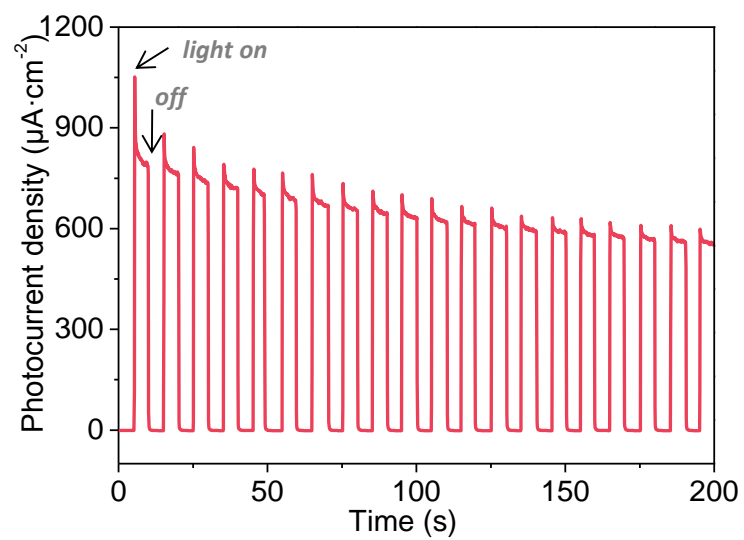

**Figure S5.** Photocurrent density of FTO/TiO<sub>2</sub>/DAPyr versus different initial bias.



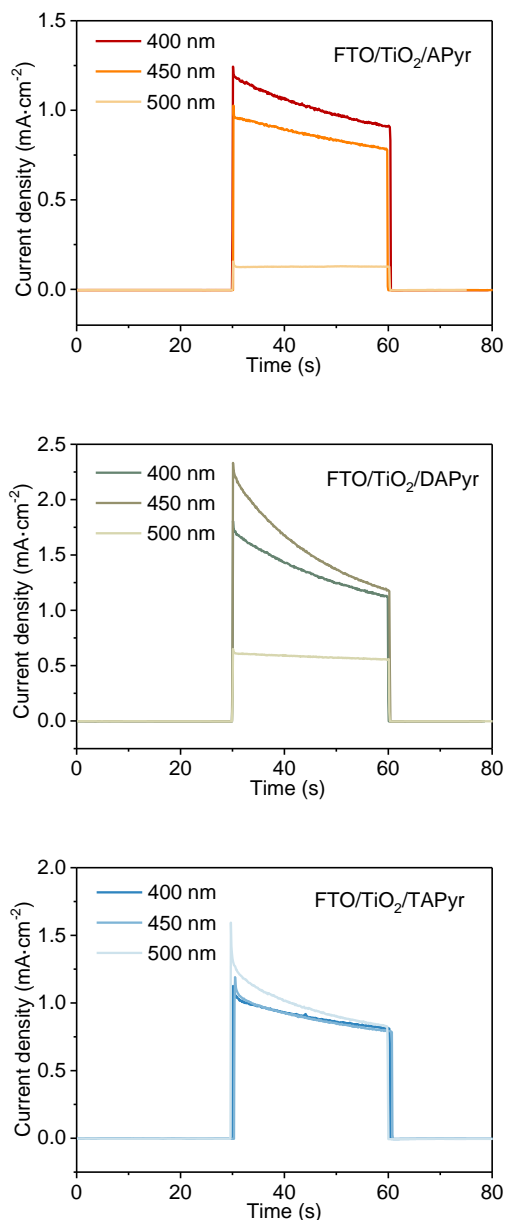

**Figure S6.** The photocurrent generated in the PECs under monochromatic light with wavelengths of 400, 450, and 500 nm.

$$\text{IPCE}\% = \frac{1240 (\text{V} \times \text{nm}) \times J(\text{photocurrent})(\text{mA}/\text{cm}^2)}{\text{Wavelength}(\text{nm}) \times I(\text{photo power})(\text{mW}/\text{cm}^2)} \times 100\%$$

$J$  is the steady-state photocurrent density and  $I$  is the incident power density at each wavelength.

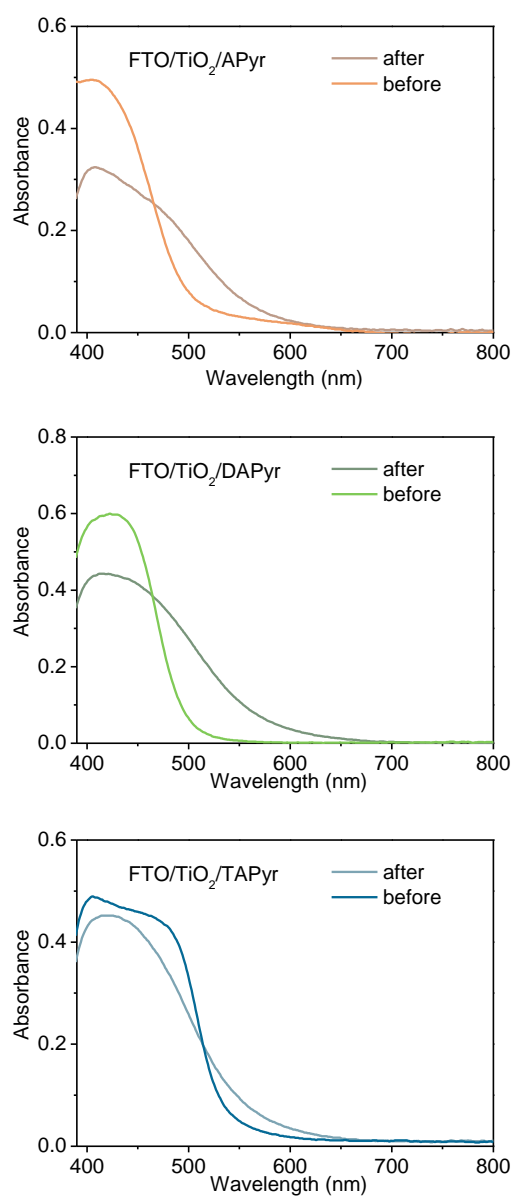

**Figure S7.** Absorption spectra of the electrodes before and after irradiation for 30 min ( $1.1 \text{ W/cm}^2$ ).

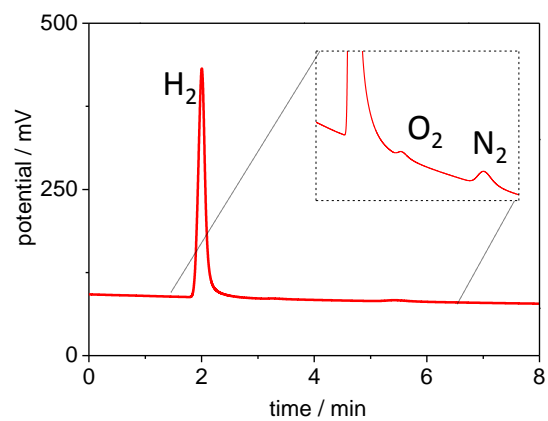

**Figure S8.** Gas chromatograms analysis to the gas collected at the Pt counter electrode of a representative PEC with FTO/TiO<sub>2</sub>/**TAPyr** photoanode.

**Table S1.** Parameters of DSPECs with different dyes<sup>a</sup>

| dye                           | APyr    | DAPyr   | TAPyr   |
|-------------------------------|---------|---------|---------|
| $Q/\mu\text{C}$               | 1325248 | 2666559 | 3571825 |
| $n(\text{e}^-)/\mu\text{mol}$ | 13.74   | 27.64   | 37.02   |
| $V(\text{H}_2)/\mu\text{L}$   | 167     | 330     | 442     |
| $n(\text{H}_2)/\mu\text{mol}$ | 6.80    | 13.40   | 17.95   |
| Faraday efficiency            | 99%     | 97%     | 97%     |

<sup>a</sup>The Faraday efficiency (FE) is calculated by the following equation:  $\text{FE} = 100\% \times n(\text{H}_2) (\mu\text{mol}) \times 2 \times 96485 (\text{C} \cdot \text{mol}^{-1}) / Q (\mu\text{C})$ . The photoanode has an area of  $1 \times 1 \text{ cm}^2$ .

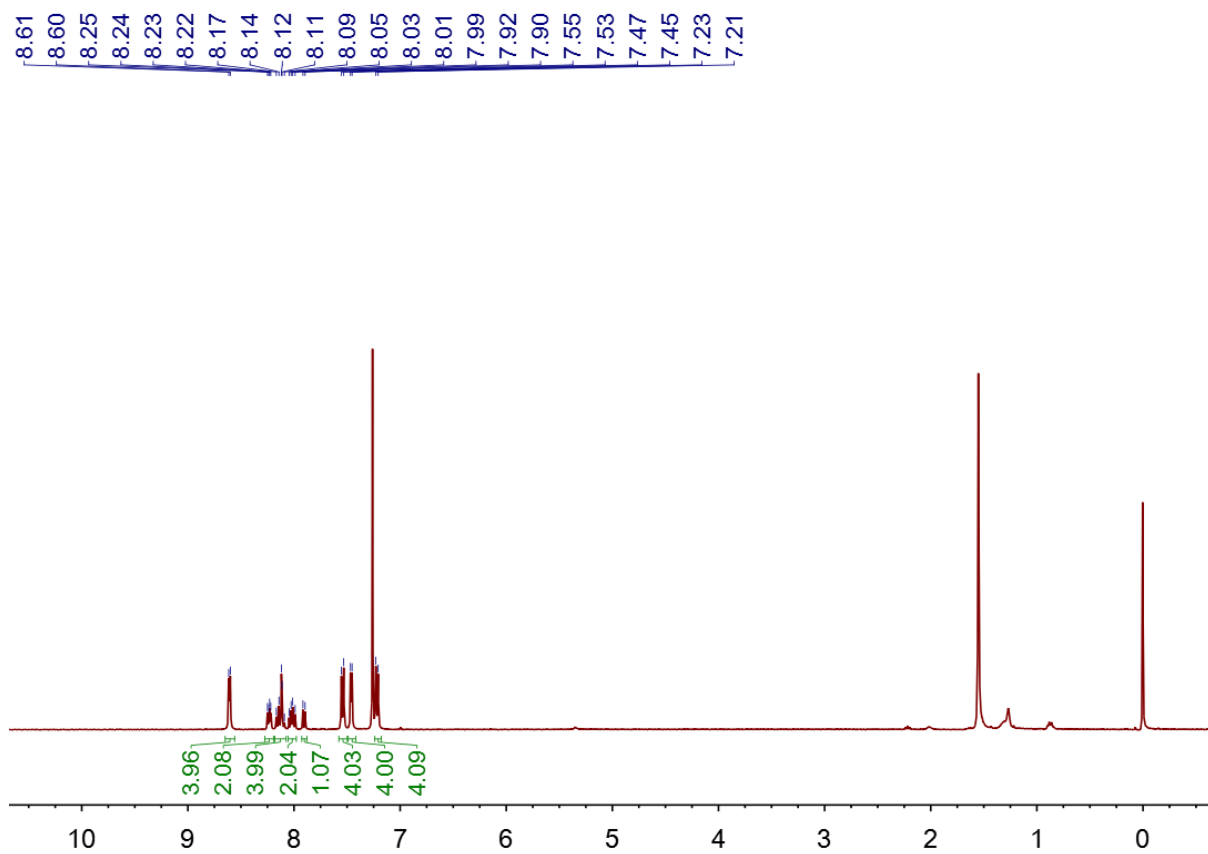

**Figure S9.**  $^1\text{H}$  NMR spectrum of APyr in chloroform- $d$ .

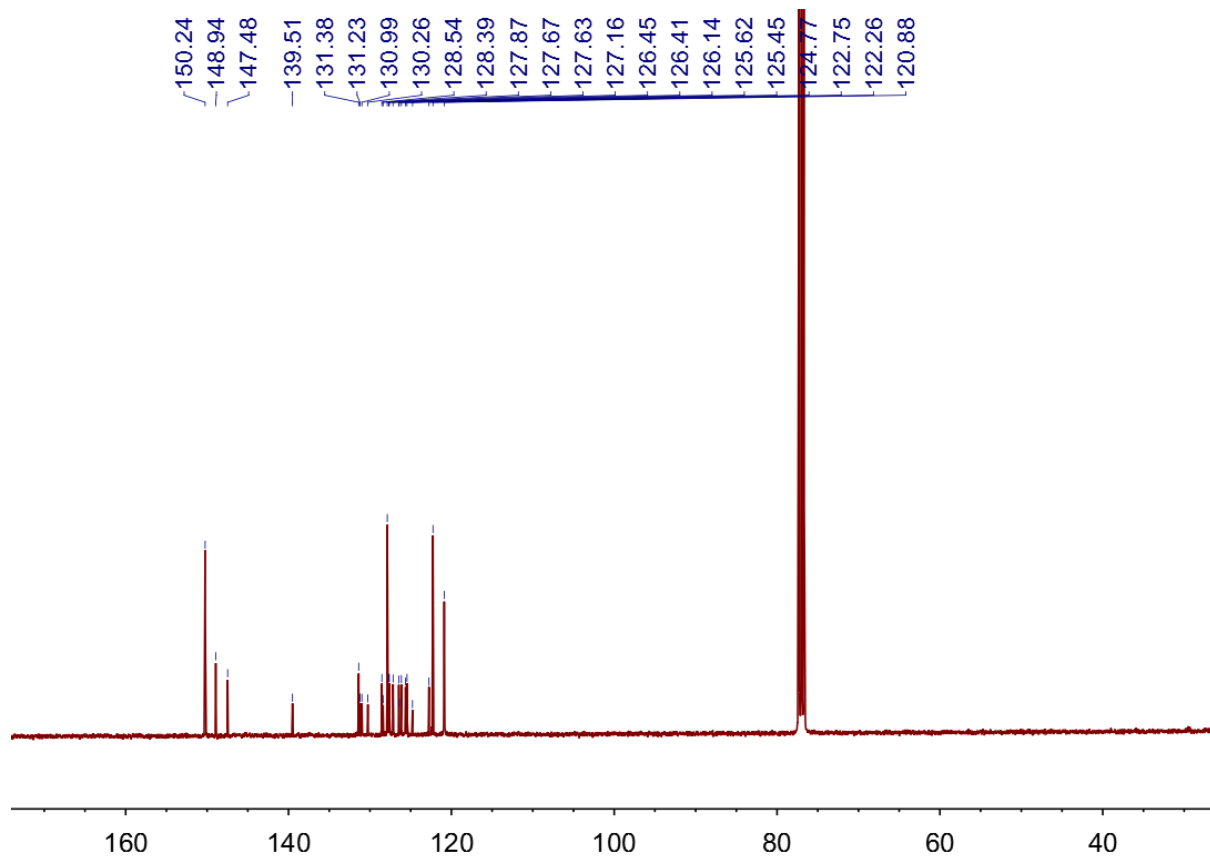

**Figure S10.**  $^{13}\text{C}$  NMR spectrum of APyr in chloroform-*d*.

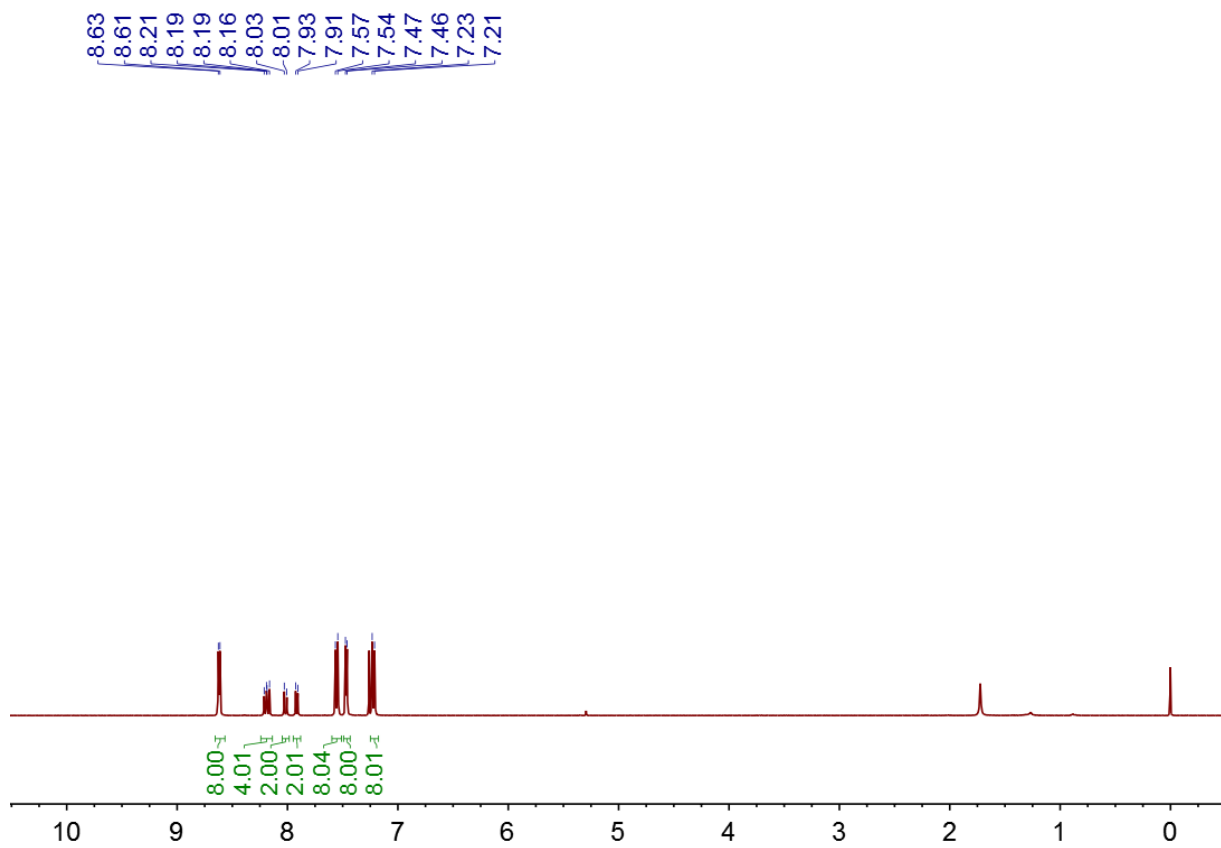

**Figure S11.**  $^1\text{H}$  NMR spectrum of **DAPyr** in chloroform-*d*.

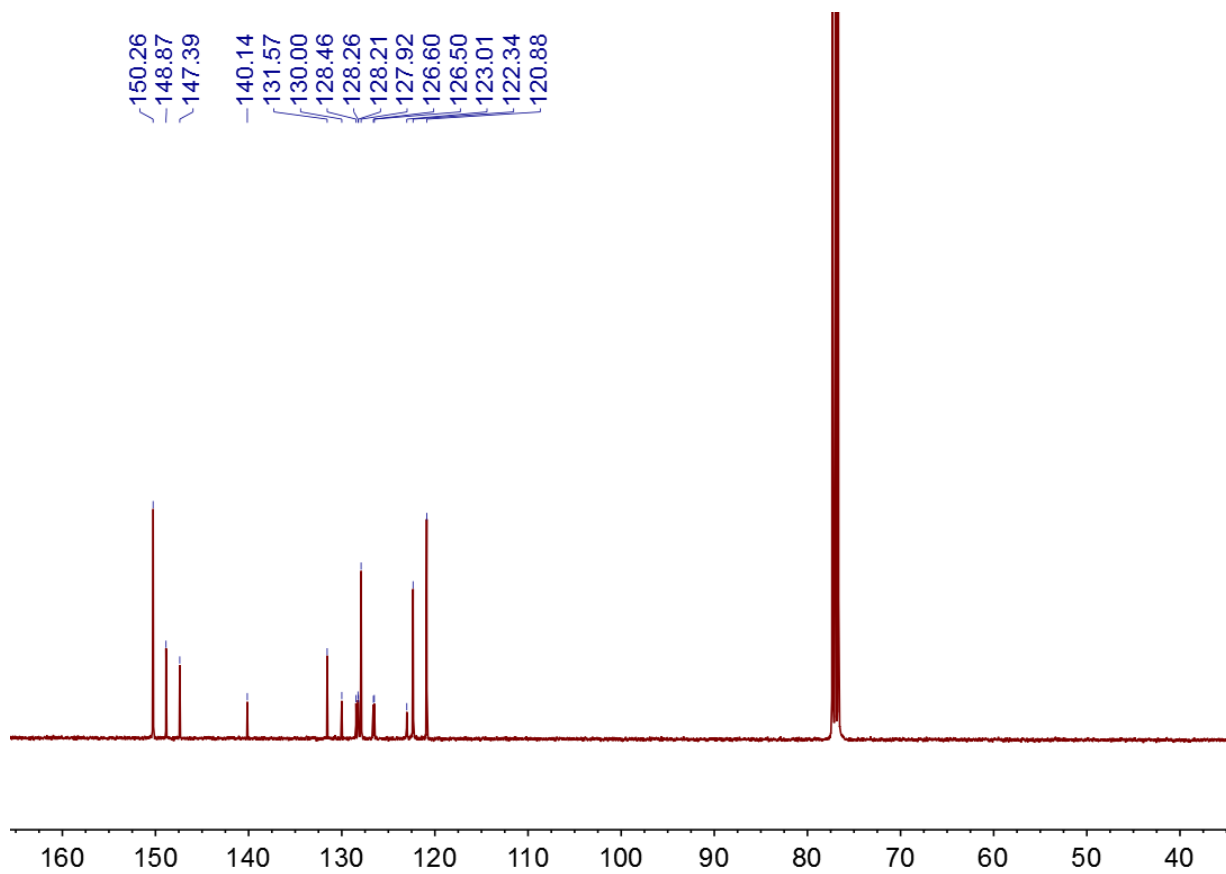

**Figure S12.**  $^{13}\text{C}$  NMR spectrum of **DAPyr** in chloroform-*d*.



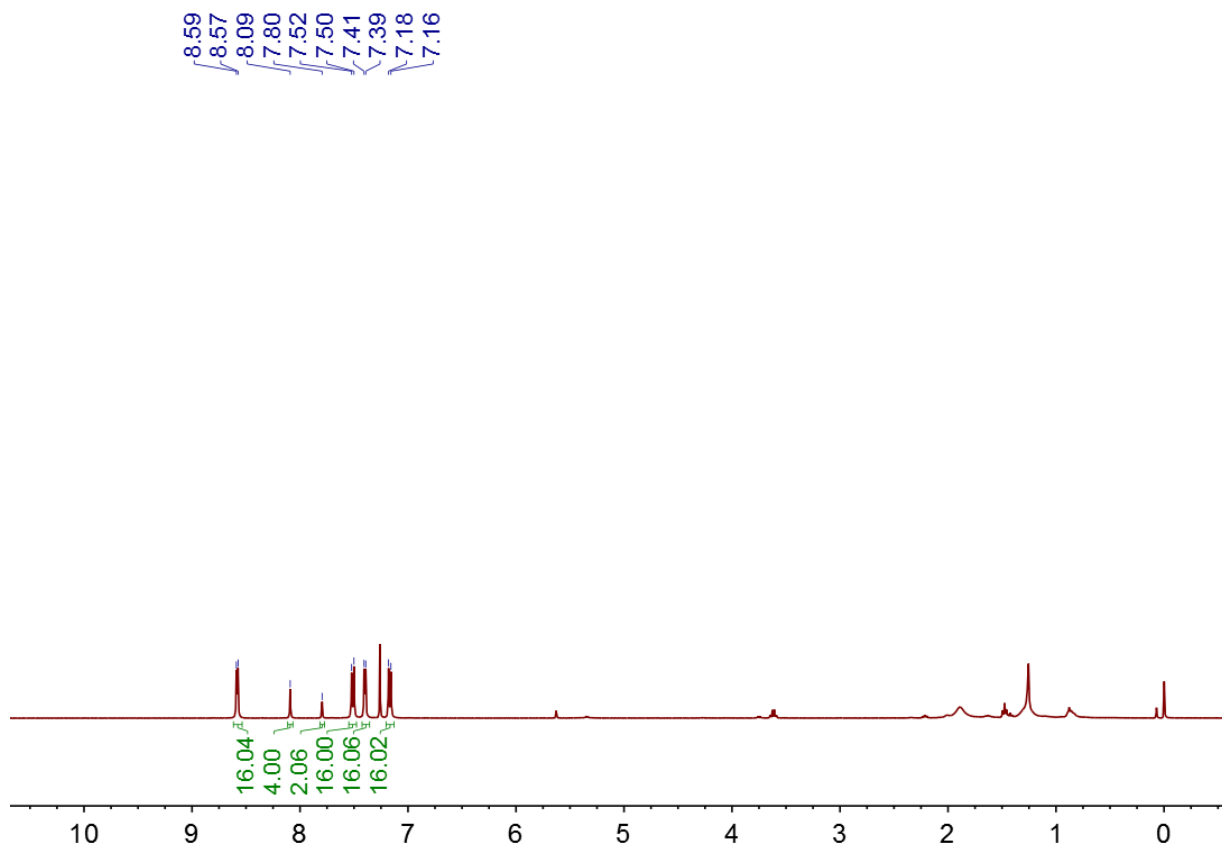

**Figure S13.**  $^1\text{H}$  NMR spectrum of **TAPyr** in chloroform-*d*.

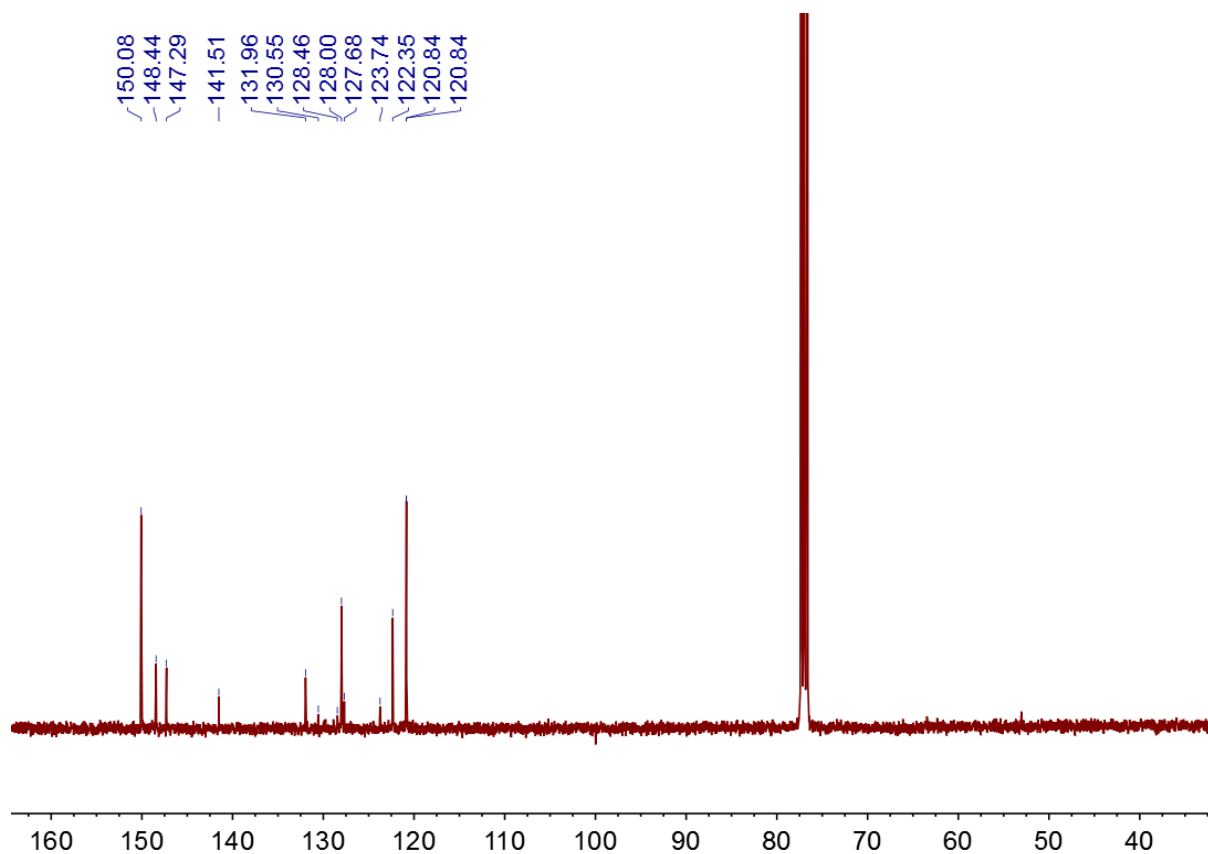

**Figure S14.**  $^{13}\text{C}$  NMR spectrum of **TAPyr** in chloroform-*d* :

Reference:

1. J.-H. Tang, Z. Cai, D. Yan, K. Tang, J.-Y. Shao, C. Zhan, D. Wang, Y.-W. Zhong, L.-J. Wan and J. Yao, *J. Am. Chem. Soc.*, 2018, **140**, 12337-12340.
